# Supplementary material for: Characterization of ship breaking industry in Bangladesh
Source: Springer Nature journal article supplement (doi:10.1007/s10163-013-0224-8), 2014-01-07
Supplement: MOESM1 [file 5334720]

Online Resource 1: Difference of the ship types dismantled both in Bangladesh and rest of the world (ROW) in 2010
